# Supplementary material for: The &lt;i&gt;Staphylococcus aureus&lt;/i&gt; toxin–antitoxin system YefM–YoeB is associated with antibiotic tolerance and extracellular dependent biofilm formation
Source: Copernicus journal article supplement (doi:10.5194/jbji-6-241-2021), 2021-07-02
Supplement: Supplementary file [file jbji-6-241-2021-supplement.pdf]

Supplement of J. Bone Joint Infect., 6, 241–253, 2021  
<https://doi.org/10.5194/jbji-6-241-2021-supplement>  
© Author(s) 2021. CC BY 4.0 License.

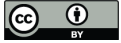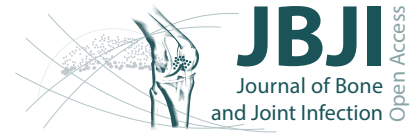

*Supplement of*

**The *Staphylococcus aureus* toxin–antitoxin system YefM–YoeB is associated with antibiotic tolerance and extracellular dependent biofilm formation**

Xinyu Qi et al.

*Correspondence to:* Kenneth L. Urish (urishk2@upmc.edu)

The copyright of individual parts of the supplement might differ from the article licence.

Figure S1. Loss of *yoeB* results in reduced PIA. Chemidoc image analysis of biofilm PIA content for (a) Newman and (b) USA300-JE2 strain backgrounds. (\* $p < 0.05$ )

Figure S2. Loss of *yoeB* results in Newman reduced biofilm associated eDNA. Biofilm percent eDNA relative to WT for (a) Newman and (b) USA300-JE2 strain backgrounds. (ns = not significant, \* $p < 0.05$ ).

Figure S3. Biofilm protein content for *S. aureus* strains quantified by Bicinchoninic Acid (BCA) (a) Newman and (b) USA300-JE2. (ns = not significant)

a

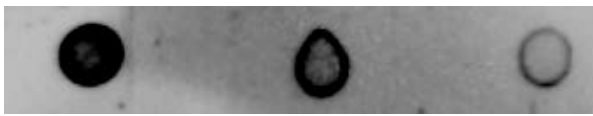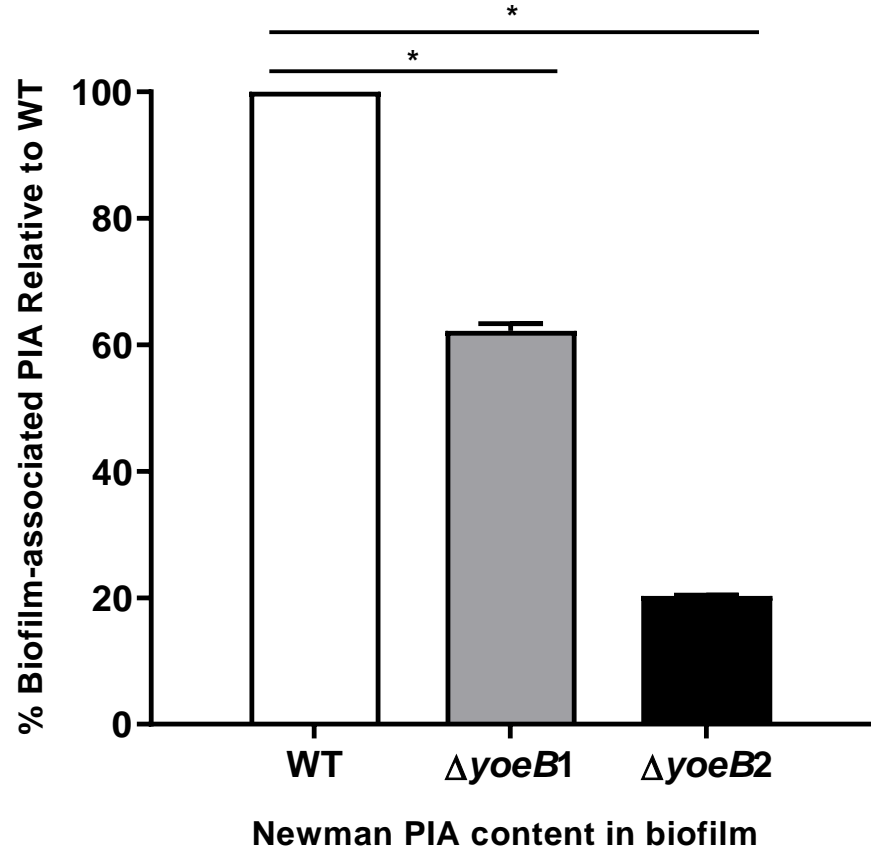

b

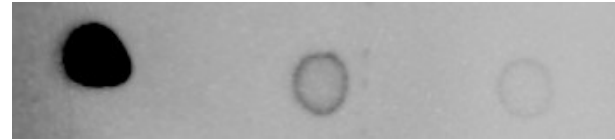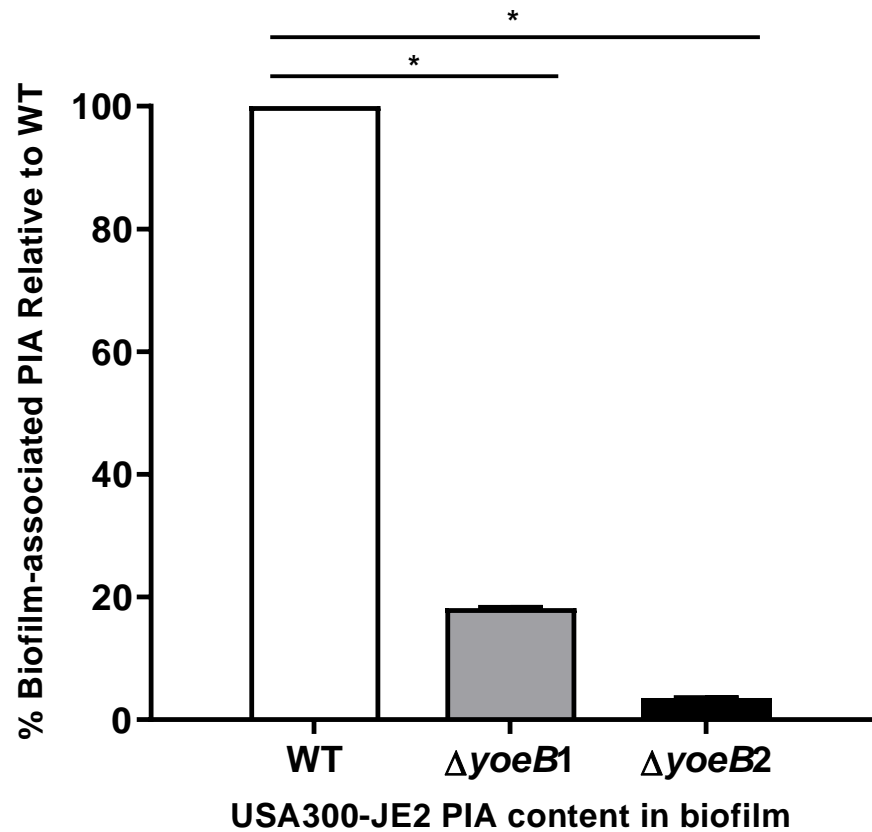

**Figure S1.** Loss of *yoeB* results in reduced PIA. Chemidoc image analysis of biofilm PIA content for (a) Newman and (b) USA300-JE2 strain backgrounds. (\* $p < 0.05$ )

a

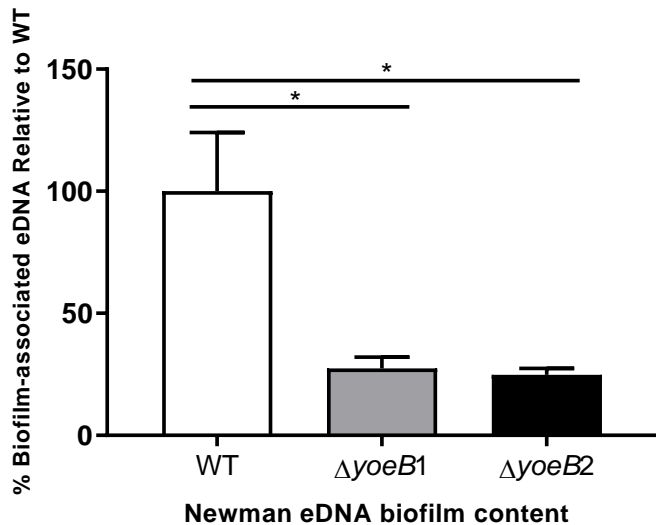

b

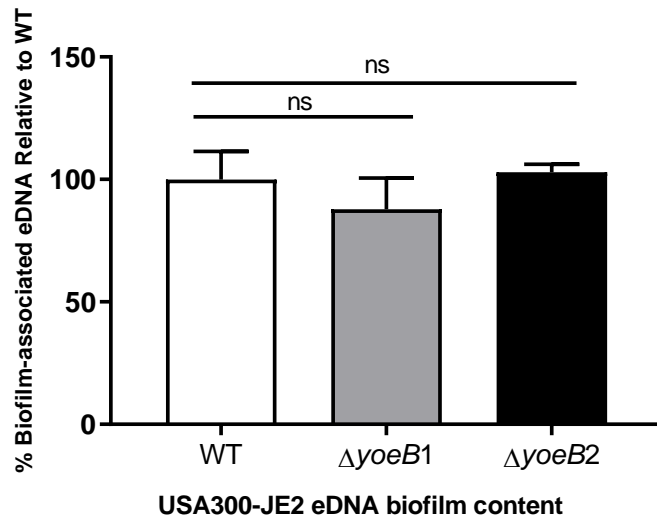

**Figure S2.** Loss of *yoeB* results in Newman reduced biofilm associated eDNA. Biofilm percent eDNA relative to WT for (a) Newman and (b) USA300-JE2 strain backgrounds. (ns = not significant, \* $p < 0.05$ )

a

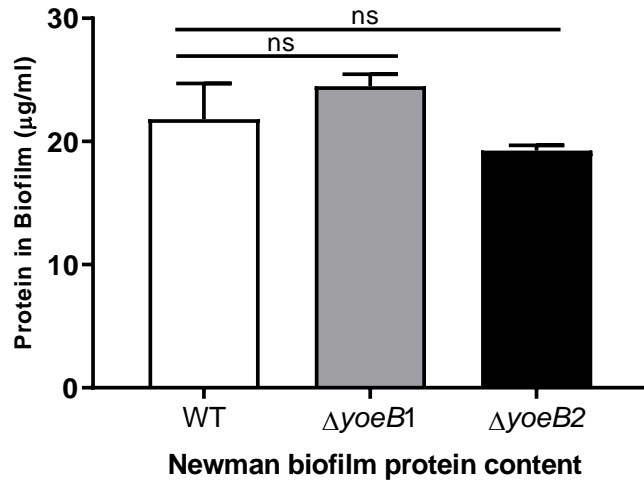

b

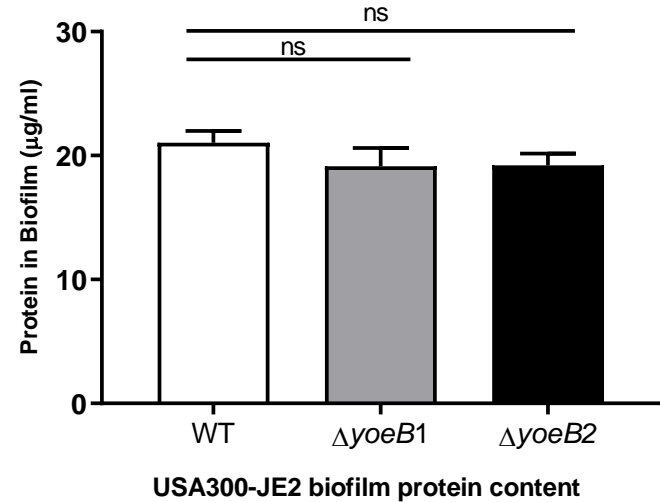

Figure S3. Biofilm protein content for *S. aureus* strains quantified by Bicinchoninic Acid (BCA) (a) Newman and (b) USA300-JE2. (ns = not significant)
